# Supplementary material
Source: MDPI journal article supplement (https://www.mdpi.com/2410-3888/7/1/16)
Supplement: s1 [file s1]

### Supplementary data 3:

#### 1-Data from larvae at hatching:

Total variance explained (re-scaled values):

| Component | Initial characteristic value |              |         | Extraction of sum of squares loaded |              |         |
|-----------|------------------------------|--------------|---------|-------------------------------------|--------------|---------|
|           | Total                        | Variance (%) | Sum (%) | Total                               | Variance (%) | Sum (%) |
| 1         | 3.952E-006                   | 96.202       | 96.202  | 3.774                               | 94.352       | 94.352  |
| 2         | 1.045E-007                   | 2.544        | 98.746  | 0.117                               | 2.937        | 97.290  |
| 3         | 4.481E-008                   | 1.091        | 99.837  |                                     |              |         |
| 4         | 6.706E-009                   | 0.163        | 100.000 |                                     |              |         |

Component's matrix (re-scaled values):

| Variable       | Component |        |
|----------------|-----------|--------|
|                | 1         | 2      |
| Head length    | 0.990     | -0.099 |
| Body depth     | 0.981     | -0.110 |
| Head width     | 0.969     | 0.248  |
| Pre Orb length | 0.945     | 0.185  |

## 2-Data from larvae at 16 dpf:

Total variance explained (re-scaled values):

| Component | Initial characteristic value |              |         | Extraction of sum of squares loaded |              |         |
|-----------|------------------------------|--------------|---------|-------------------------------------|--------------|---------|
|           | Total                        | Variance (%) | Sum (%) | Total                               | Variance (%) | Sum (%) |
| 1         | 4.573E-008                   | 81.684       | 81.684  | 8.179                               | 74.347       | 74.347  |
| 2         | 4.627E-009                   | 8.265        | 89.949  | 0.707                               | 6.423        | 80.770  |
| 3         | 3.107E-009                   | 5.550        | 95.499  |                                     |              |         |
| 4         | 1.231E-009                   | 2.199        | 97.691  |                                     |              |         |
| 5         | 5.909E-010                   | 1.055        | 98.753  |                                     |              |         |
| 6         | 3.125E-010                   | 0.558        | 99.311  |                                     |              |         |
| 7         | 1.424E-010                   | 0.254        | 99.565  |                                     |              |         |
| 8         | 1.110E-010                   | 0.198        | 99.763  |                                     |              |         |
| 9         | 6.521E-011                   | 0.116        | 99.879  |                                     |              |         |
| 10        | 4.612E-011                   | 0.082        | 99.961  |                                     |              |         |
| 11        | 2.178E-011                   | 0.039        | 100.000 |                                     |              |         |

Component's matrix\_(re-scaled values):

| Variable        | Component |        |
|-----------------|-----------|--------|
|                 | 1         | 2      |
| Pre Anal lenght | 0,942     | -0,279 |
| Pre Pect length | 0,916     | 0,083  |
| Head length     | 0,914     | 0,354  |
| Head width      | 0,906     | 0,228  |
| Pre Pelv length | 0,890     | -0,112 |
| Body depth      | 0,872     | 0,023  |
| Jaw width       | 0.861     | 0.158  |

|                       |       |       |
|-----------------------|-------|-------|
| <b>Pre Orb length</b> | 0.833 | 0.250 |
| <b>Jaw length</b>     | 0.816 | 0.519 |
| <b>Cerato length</b>  | 0.805 | 0.223 |
| <b>Cerato dist</b>    | 0.702 | 0.160 |
